# Supplementary material for: Application of a Developed Numerical Model for Surfactant Flushing Combined with Intermittent Air Injection at Field Scale
Source: MDPI journal article supplement (doi:10.3390/w14030316), 2022-01-21
Supplement: s1 [file s1]

Archive with 1 entries (1 files):
- water-1539782-supplementary.pdf
