# Supplementary material for: Application of a Developed Numerical Model for Surfactant Flushing Combined with Intermittent Air Injection at Field Scale
Source: MDPI journal article supplement (doi:10.3390/w14030316), 2022-01-21
Supplement: s1 [file s1 › water-1539782-supplementary.pdf]

## Special Issue "Remediation of NAPL-Contaminated Groundwater Aquifers"

### Title: Application of a Developed Numerical Model for Surfactant Flushing Combined with Intermittent Air Injection at Field Scale

Hwan Lee<sup>a</sup>, Heejun Suk<sup>b</sup>, Jui-Sheng Chen<sup>c</sup> and Eungyu Park<sup>d</sup>

<sup>a</sup> Member, Researcher, SG Institute of Environment Science & Technology, Gunsan City 54012, Korea (Email: zy9018@hanmail.net)

<sup>b</sup> Member, Senior Researcher, Korea Institute of Geoscience and Mineral Resources, Daejeon 34132, Korea (Email: sxh60@kigam.re.kr)

<sup>c</sup> Professor, Graduate Institute of Applied Geology, National Central University, Taoyuan City 320, Taiwan (Email: jschen@geo.ncu.edu.tw)

<sup>d</sup> Professor, Dept. of Geology, Kyungpook National University, 80 Daehak-ro, Buk-gu, Daegu 41566, Korea (Email: park.eungyu@gmail.com)

### S.1 Equation Governing Multiphase Flow

The multiphase system in a porous medium is assumed to be composed of two phases: water and NAPL. For simplicity, we consider only incompressible fluids. The equations describing the flow of two fluid phases in a porous medium are based on conservation of mass (Suk and Yeh, 2007, 2008; Suk et al., 2011):

$$\frac{\partial \phi \rho_i S_i}{\partial t} + \nabla \cdot (\rho_i V_i) = Q_i + \sum_j E_{ij}, \quad i = 1, 2 \quad \text{in } \Omega \quad (\text{S1})$$

$$V_i = -\frac{k_{rik}}{\mu_i} (\nabla p_i + \rho_i g \nabla z), \quad i = 1, 2 \quad (\text{S2})$$

where  $\rho_i$  is the density of phase  $i$  [ $M L^{-3}$ ], with the subscript  $i$  indicating the phase (1 for water and 2 for NAPL),  $\phi$  is the effective porosity of the porous medium [ $L^3 L^{-3}$ ],  $S_i$  is the saturation of phase  $i$  [ $L^3 L^{-3}$ ],  $t$  is time [T],  $Q_i$  is the source and sink term for phase  $i$  [ $M L^{-3} T^{-1}$ ],  $E_{ij}$  is the rate of mass exchange from phase  $j$  to phase  $i$  [ $M L^{-3} T^{-1}$ ],  $V_i$  is the Darcy velocity of phase  $i$  [ $L T^{-1}$ ],  $k_{ri}$  is the relative permeability of phase  $i$  [-],  $k$  is the intrinsic permeability tensor [ $L^2$ ],  $\mu_i$  is the dynamic viscosity of phase  $i$  [ $M L^{-1} T^{-1}$ ],  $p_i$  is the pressure of phase  $i$  [ $M L^{-1} T^{-2}$ ],  $g$  is the gravitational constant [ $L T^{-2}$ ],  $z$  is elevation [L], and  $\Omega$  is an interested bounded area. Initial condition can be expressed as combination of pressures or saturations of each phases:

$$p_i = p_{i,0}, \quad i=1,2 \quad \text{in } \Omega$$

or

$$S_i = S_{i,0}, \quad i=1,2 \quad \text{in } \Omega \quad (S3)$$

where  $p_{i,0}$  and  $S_{i,0}$  are initial pressures [ $M L^{-1} T^{-2}$ ] and saturations [-] of phase  $i$ , respectively, in domain  $\Omega$ . The boundary conditions for Eq. (S1) are generally given as:

$$p_i = p_{i,D}, \quad i=1,2 \quad \text{on } \Gamma_1$$

$$-n \cdot \left( \frac{k_{ri}k}{\mu_i} \cdot \nabla p_i \right) = q_{i,N}, \quad i=1,2 \quad \text{on } \Gamma_2$$

$$-n \cdot \left[ \frac{k_{ri}k}{\mu_i} (\nabla p_i + \rho_i g \nabla z) \right] = n \cdot V_i = q_{i,C}, \quad i=1,2 \quad \text{on } \Gamma_3 \quad (S4)$$

where  $n$  is the unit outward vector normal to the boundary  $\Gamma$ , and  $p_{i,D}$ ,  $q_{i,N}$ , and  $q_{i,C}$  are the specified pressure [ $M L^{-1} T^{-2}$ ] along  $\Gamma_1$ , specified pressure normal gradient [ $L T^{-1}$ ] on  $\Gamma_2$ , and prescribed flux [ $L T^{-1}$ ] normal to  $\Gamma_3$  of phase  $i$ , respectively, with  $\Gamma = \Gamma_1 + \Gamma_2 + \Gamma_3$  being

the boundary of domain  $\Omega$ . Relative permeability relationships corresponding to the van Genuchten model are expressed as:

$$k_{r1} = \bar{S}_1^{1/2} \left[ 1 - (1 - \bar{S}_1^{1/m})^m \right]^2 \quad (\text{S5})$$

$$k_{r2} = \bar{S}_2^{1/2} \left\{ (1 - \bar{S}_1^{1/m})^m - [1 - (\bar{S}_1 + \bar{S}_2)^{1/m}]^m \right\}^2 \quad (\text{S6})$$

where  $m$  is the curve shape parameter. The capillary pressure-saturation relationship in the water-NAPL phase system follows the model of Parker et al. (1987), as follows:

$$\bar{S}_1 = [1 + (\alpha_{21} h_{21})^n]^{-m}, \quad \text{if } h_{21} > 0 \quad (\text{S7})$$

$$\bar{S}_1 = 1, \quad \text{if } h_{21} \leq 0 \quad (\text{S8})$$

where  $n$  [-] and  $\alpha_{21}$  [ $\text{L}^{-1}$ ] are the van Genuchten parameters and  $h_{21}(=h_2 - h_1)$  is the NAPL-water capillary head [L],  $h_1$  is the pressure head of water phase [L], and  $h_2$  is the pressure head of NAPL phase [L].  $\bar{S}_1$  is water saturation and is defined as follows:

$$\bar{S}_1 = \frac{S_1 - S_{1r}}{1 - S_{1r}}, \quad \bar{S}_2 = \frac{S_2 - S_{2r}}{1 - S_{2r}} \quad (\text{S9})$$

where  $S_{1r}$  is the irreducible saturation of the water phase [-] and  $S_{2r}$  is the residual NAPL saturation [-]. The total velocity,  $V_t$  [ $\text{L T}^{-1}$ ], given by the sum of the velocities of the two phases, is defined as follows:

$$V_t = V_1 + V_2 \quad (\text{S10})$$

Using Eq. (S2), Eq. (S10) can be rewritten as:

$$V_t = -\sum_{i=1}^2 \frac{k_{rik}}{\mu_i} (\nabla p_i + \rho_i g \nabla z) \quad (S11)$$

Based on Eq. (S11), we can define the total mobility,  $\kappa$  [ $L^3 T M^{-1}$ ], fractional mobility for phase  $i$ ,  $\kappa_i$ , and mobility-weighted average fluid density [-],  $\bar{\rho}$  [ $M L^{-3}$ ] as follows:

$$\kappa = \sum_{i=1}^2 \frac{k_{rik}}{\mu_i} \quad (S12)$$

$$\kappa_i = \frac{\frac{k_{ri}}{\mu_i}}{\sum_{j=1}^2 \left( \frac{k_{rj}}{\mu_j} \right)}, \quad i=1,2 \quad (S13)$$

$$\bar{\rho} = \kappa_1 \rho_1 + \kappa_2 \rho_2 \quad (S14)$$

Substituting Eqs. (S12)–(S14) into Eq. (S11) results in:

$$V_t = -\kappa \left[ \frac{1}{2} \nabla(p_1 + p_2) + \left( \frac{\kappa_1 - \kappa_2}{2} \right) \nabla(p_1 - p_2) \right] - \kappa \bar{\rho} g \nabla z \quad (S15)$$

where  $\kappa_1 + \kappa_2 = 1$ . If we define the total pressure,  $P_t$  [ $M L^{-1} T^{-2}$ ], of an imaginary variable as follows:

$$P_t = \frac{p_1 + p_2}{2} + \frac{1}{2} \left[ \int_0^{p_1 - p_2} (\kappa_1 - \kappa_2) d\eta \right] \quad (S16)$$

Eq. (S15) becomes:

$$V_t = -\kappa \cdot (\nabla P_t + \bar{\rho} g \nabla z) \quad (\text{S17})$$

The total pressure in the water and NAPL two-phase system is calculated as follows (Suk and Yeh, 2007; Suk and Yeh, 2008; Suk et al., 2011):

$$-\nabla \cdot \kappa \cdot (\nabla P_t + \bar{\rho} g \nabla z) = \frac{Q_1}{\rho_1} + \frac{Q_2}{\rho_2} + \frac{E_n^w}{\rho_1} - \frac{E_n^w}{\rho_2} \quad \text{in } \Omega \quad (\text{S18})$$

where  $E_n^w$  is the mass exchange from the NAPL to the water phase [ $\text{M L}^{-3} \text{T}^{-1}$ ]. Initial and boundary conditions of total pressure equation can be transformed from Eqs. (S1)-(S4) according to numerical schemes provided by Suk and Yeh (2008). In Eq. (S18), the total mobility,  $\kappa$  [ $\text{L}^3 \text{T M}^{-1}$ ], is an independent parameter of the total pressure,  $P_t$  [ $\text{M L}^{-1} \text{T}^{-2}$ ], and the equation is linear. The velocities of the water and NAPL phases determined using Eq. (S15) are as follows:

$$V_1 = \kappa_1 V_t - \kappa_1 \kappa \kappa_2 \nabla P_{c12} - \kappa_1 \kappa (\rho_1 - \bar{\rho}) g \nabla z \quad (\text{S19})$$

$$V_2 = \kappa_2 V_t - \kappa_2 \kappa \kappa_1 \nabla P_{c21} - \kappa_2 \kappa (\rho_2 - \bar{\rho}) g \nabla z \quad (\text{S20})$$

where  $P_{c12}(P_{c21})$  [ $\text{M L}^{-1} \text{T}^{-2}$ ] is the capillary pressure of water (NAPL) and NAPL (water). Assuming incompressible flow and continuity of the total flux, Eq. (S19) can be substituted into the water-phase mass conservation equation (S1), resulting in the following water saturation equation:

$$\begin{aligned} \frac{\partial \phi S_1}{\partial t} + V_t \cdot \frac{d\kappa_1}{dS_1} \nabla S_1 &= \nabla \cdot \kappa_1 \kappa \kappa_2 \frac{\partial P_{c12}}{\partial S_1} \cdot \nabla S_1 - \kappa_1 \nabla \cdot V_t \\ &+ \nabla \cdot \kappa_1 \kappa \cdot (\rho_1 - \bar{\rho}) g \nabla z + \frac{Q_1}{\rho_1} + \frac{E_n^w}{\rho_1} \end{aligned} \quad (\text{S21})$$

Initial and boundary conditions of water saturation equation can be obtained from Eqs. (S1)-(S4) according to numerical schemes provided by Suk and Yeh (2008).

## S.2 Transport Equations for Dissolved NAPL Species and Surfactant

The transport behavior of a dissolved contaminant can be described based on adsorption and surfactant-enhanced dissolution from the NAPL to aqueous phase, as follows:

$$\frac{\partial \theta_1 C_o}{\partial t} + \rho_b \frac{\partial S_o}{\partial t} + \nabla \cdot (V_1 C_o) - \nabla \cdot (\theta_1 D \cdot \nabla C_o) = E_n^w$$

Initial conditions

$$C_o = C_{o,0} \quad \text{in } \Omega$$

Boundary conditions

$$C_o = C_{o,D} \quad \text{on } \Gamma_D$$

$$-n \cdot (\theta_1 D \cdot \nabla C_o) = f_{o,N} \quad \text{on } \Gamma_N$$

$$n \cdot (V_1 C_o - \theta_1 D \cdot \nabla C_o) = f_{o,C} \quad \text{on } \Gamma_C \quad (\text{S22})$$

where  $C_o$  is the concentration of the dissolved contaminant [ $\text{M L}^{-3}$ ],  $\rho_b$  is the bulk density [ $\text{M L}^{-3}$ ],  $S_o$  is the contaminant mass adsorbed into the soil mass [ $\text{M M}^{-1}$ ],  $\theta_1$  is the water content [ $\text{L}^3 \text{L}^{-3}$ ],  $C_{o,0}$  is initial concentration of the dissolved contaminant [ $\text{M L}^{-3}$ ] in domain  $\Omega$ , and  $C_{o,D}$ ,  $f_{o,N}$ , and  $f_{o,C}$  are the specified concentration [ $\text{M L}^{-3}$ ] along Dirichlet boundary  $\Gamma_D$ , specified gradient concentration [ $\text{M L}^{-2} \text{T}^{-1}$ ] normal to Neumann boundary  $\Gamma_N$ , and prescribed flux [ $\text{M L}^{-2} \text{T}^{-1}$ ] normal to Cauchy boundary  $\Gamma_C$  of the dissolved contaminant, respectively.  $\theta_1 D$  is the dispersion coefficient [ $\text{L}^2 \text{T}^{-1}$ ], which is defined as follows:

$$\theta_1 D = \alpha_T |V_1| \delta + (\alpha_L - \alpha_T) \frac{V_1 V_1}{|V_1|} + \theta_1 a_m \tau \delta \quad (\text{S23})$$

where  $|V_1|$  is the magnitude of  $V_1$  [ $\text{L T}^{-1}$ ],  $\delta$  is the Kronecker delta tensor,  $\alpha_L$  and  $\alpha_T$  are the longitudinal and transverse dispersivities [L], respectively,  $a_m$  is the molecular diffusion coefficient [ $\text{L}^2 \text{T}^{-1}$ ], and  $\tau$  is the tortuosity [-]. Considering linear adsorption:

$$S_o = K_{d,o} C_o \quad (\text{S24})$$

where  $K_{d,o}$  is the distribution coefficient between adsorbed and aqueous NAPL species [ $\text{L}^3 \text{M}^{-1}$ ]. Eq. (S22) can be rewritten using Eq. (S24), as follows:

$$\theta_1 \frac{\partial C_o}{\partial t} + C_o \frac{\partial \theta_1}{\partial t} + \rho_b K_{d,o} \frac{\partial C_o}{\partial t} + V_1 \nabla \cdot (C_o) + C_o \nabla \cdot (V_1) - \nabla \cdot (\theta_1 D \cdot \nabla C_o) = E_n^w \quad (\text{S25})$$

The mass conservation equation of a dissolved contaminant can be expressed as follows:

$$\frac{\partial \rho_1 \theta_1}{\partial t} = -\nabla \cdot (\rho_1 V_1) + Q_1 \quad (\text{S26})$$

where  $Q_1$  is the source and sink term for water [ $\text{M L}^{-3} \text{T}^{-1}$ ]. Eq. (S25) can be rewritten using Eq. (S26), as follows:

$$(\theta_1 + \rho_b K_{d,o}) \frac{\partial C_o}{\partial t} + V_1 \cdot \nabla C_o - \nabla \cdot (\theta_1 D \cdot \nabla C_o) + \frac{Q_1}{\rho_1} C_o = E_n^w \quad (\text{S27})$$

To solve this equation using Lagrangian-Eulerian methods, Eq. (S27) can be expressed in the advective form:

$$(\theta_1 + \rho_b K_{d,o}) \frac{D_{V_{d,o}} C_o}{Dt} - \nabla \cdot (\theta_1 D \cdot \nabla C_o) + \frac{Q_1}{\rho_1} C_o = E_n^w \quad (\text{S28})$$

where

$$V_{d,o} = \frac{V_1}{\theta_1 + \rho_b K_{d,o}} \quad (\text{S29})$$

The mass exchange rate from the NAPL phase to the water phase can be determined as follows Zhong et al. (2003):

$$E_n^w = C_n^w (\overline{\rho_n^w} - C_o) \quad (\text{S30})$$

$$C_n^w = \frac{a_m}{(d_p)^2} Sh, \quad Sh = \beta_0 (R_e)^{\beta_1} (\theta_2)^{\beta_2}, \quad R_e = \frac{d_p v_1 \rho_1}{\mu_1} \quad (\text{S31})$$

$$\overline{\rho_n^w} = \overline{\rho_{n,pure}^w} + \gamma C_s \quad (\text{S32})$$

where  $C_n^w$  is the rate coefficient, which regulates the rate at which equilibrium is reached [ $\text{T}^{-1}$ ],  $a_m$  is the molecular diffusion coefficient [ $\text{L}^2 \text{T}^{-1}$ ],  $d_p$  is the mean particle diameter [ $\text{L}$ ],  $Sh$  is the Sherwood number [-],  $R_e$  is the Reynolds number [-],  $v_1$  is the seepage velocity [ $\text{L T}^{-1}$ ],  $\rho_1$  is the water density [ $\text{M L}^{-3}$ ],  $\mu_1$  is the dynamic viscosity of water [ $\text{M L}^{-1} \text{T}^{-1}$ ],  $\theta_2$  is the NAPL phase volumetric content [-],  $\overline{\rho_n^w}$  is the equilibrium concentration of NAPL species in the water phase (solubility limit) [ $\text{M L}^{-3}$ ],  $\beta_0$ ,  $\beta_1$  and  $\beta_2$  are dimensionless fitting parameters [-],  $\overline{\rho_{n,pure}^w}$  is the equilibrium concentration of NAPL species in the pure water phase [ $\text{M L}^{-3}$ ],  $\gamma$  is an empirical parameter [-], and  $C_s$  is the concentration of surfactant [ $\text{M}$ ]

L<sup>-3</sup>]. Eq. (S32) was formulated by Pennell et al. (1994). Equilibrium solubility is linearly related to surfactant concentration over the CMC, as shown in Eq. (S32). Finally, the multiphase flow and solute transport equations can be obtained by substituting the mass exchange rate in Eq. (S30) into Eqs. (S18), (S21), and (S28). Because the solute transport equation for the surfactant is not related to mass exchange, its governing equation can be expressed as follows:

$$\left(\theta_1 + \rho_b K_{d,s}\right) \frac{D_{V_{d,s}} C_s}{Dt} - \nabla \cdot (\theta_1 D \cdot \nabla C_s) + \frac{Q_1}{\rho_1} C_s = 0$$

Initial conditions

$$C_s = C_{s,0} \quad \text{in } \Omega$$

Boundary conditions

$$C_s = C_{s,D} \quad \text{on } \Gamma_D$$

$$-n \cdot (\theta_1 D \cdot \nabla C_s) = f_{s,N} \quad \text{on } \Gamma_N$$

$$n \cdot (V_1 C_s - \theta_1 D \cdot \nabla C_s) = f_{s,C} \quad \text{on } \Gamma_C \quad (\text{S33})$$

where  $C_s$  is the surfactant concentration [M L<sup>-3</sup>],  $C_{s,0}$  is initial concentration of the surfactant [M L<sup>-3</sup>] in domain  $\Omega$ , and  $C_{s,D}$ ,  $f_{s,N}$ , and  $f_{s,C}$  are the specified concentration [M L<sup>-3</sup>] along Dirichlet boundary  $\Gamma_D$ , specified gradient concentration [M L<sup>-2</sup> T<sup>-1</sup>] normal to Neumann boundary  $\Gamma_N$ , and prescribed flux [M L<sup>-2</sup> T<sup>-1</sup>] normal to Cauchy boundary  $\Gamma_C$  of the surfactant, respectively.  $K_{d,s}$  is the distribution coefficient [L<sup>3</sup> M<sup>-1</sup>] between adsorbed and aqueous surfactant, and

$$V_{d,s} = \frac{V_1}{\theta_1 + \rho_b K_{d,s}} \quad (\text{S34})$$

### S.3 Numerical Formulations of Water-NAPL Phase Flow and Multispecies Transport

The total pressure equation (S18) can be solved using the standard Galerkin finite element method to obtain the total pressure at every node, as follows:

$$\sum_{e \in M_e} \int_{R^e} N_i^e \left[ \nabla \cdot \kappa \cdot (\nabla P_t + \bar{\rho} g \nabla z) + \frac{Q_1}{\rho_1} + \frac{Q_2}{\rho_2} + \frac{E_n^w}{\rho_1} - \frac{E_n^w}{\rho_2} \right] dR = 0, \quad i \in \{1, 2, \dots, N\} \quad (\text{S35})$$

where  $e$  is the element number,  $M_e$  is the total number of elements,  $R^e$  is the domain occupied by element  $e$ ,  $N_i^e$  is the Galerkin weighting function for node  $i$  of the  $e$ th element,  $i$  is the node number, and  $N$  is the total number of nodes. Eq. (S35) can be expressed in matrix form as follows:

$$[M]\{P_t\} = \{G\} + \{B\} + \{Q\} + \{E\} \quad (\text{S36})$$

where

$$[M]_{i,j} = \sum_{e \in M_e} \int_{R^e} \nabla N_i^e \cdot \kappa \cdot \nabla N_j^e dR, \quad i, j \in \{1, 2, \dots, N\} \quad (\text{S37})$$

$$\{G\}_i = - \sum_{e \in M_e} \int_{R^e} \nabla N_i^e \cdot \kappa \cdot \bar{\rho} g \nabla z dR, \quad i \in \{1, 2, \dots, N\} \quad (\text{S38})$$

$$\{B\}_i = \sum_{e \in M_e} \int_{B^e} N_i^e \hat{n} \cdot \kappa \cdot (\nabla P_t + \bar{\rho} g \nabla z) dB = - \sum_{e \in M_e} \int_{B^e} N_i^e \hat{n} \cdot V_t dB,$$

$$i \in \{1, 2, \dots, N\} \quad (\text{S39})$$

$$\{Q\}_i = \sum_{e \in M_e} \int_{R^e} N_i^e \left[ \frac{Q_1}{\rho_1} + \frac{Q_2}{\rho_2} \right] dR, \quad i \in \{1, 2, \dots, N\} \quad (\text{S40})$$

$$\{E\}_i = \sum_{e \in M_e} \int_{R^e} N_i^e \left[ \frac{E_n^w}{\rho_1} - \frac{E_n^w}{\rho_2} \right] dR, \quad i \in \{1, 2, \dots, N\} \quad (\text{S41})$$

where  $B^e$  represents the boundary of element  $e$ , and  $\hat{n}$  is the unit vector normal to the boundary of element  $e$ . The water saturation equation (S21) can be discretized using the finite element method, as follows:

$$[C_1] \left\{ \frac{\partial S_1}{\partial t} \right\} + [ADW_1 + DD_1 + WW_1] \{S_1\} = \{f_1\} \quad (S42)$$

where

$$[C_1]_{i,j} = \int_{\Omega} N_i \phi N_j dR, \quad i, j \in \{1, 2, \dots, N\} \quad (S43)$$

$$[ADW_1]_{i,j} = \int_{\Omega} W_i \frac{d\kappa_1}{dS_1} V_t \cdot \nabla N_j dR - \int_{\Omega} W_i \frac{d\kappa_1 \kappa g(\rho_1 - \bar{\rho})}{dS_1} \nabla z \cdot \nabla N_j dR, \\ i, j \in \{1, 2, \dots, N\} \quad (S44)$$

$$[DD_1]_{i,j} = \int_{\Omega} \kappa_1 \kappa (1 - \kappa_1) \frac{dP_{c12}}{dS_1} \nabla N_i \cdot \nabla N_j dR, \quad i, j \in \{1, 2, \dots, N\} \quad (S45)$$

$$[WW_1]_{i,j} = \int_{\Omega} N_i \left( \frac{\kappa_1 \nabla \cdot V_t - Q_1 / \rho_1 - E_n^w / \rho_1}{S_1} \right) N_j dR, \quad i, j \in \{1, 2, \dots, N\} \quad (S46)$$

$$\{f_1\}_i = \int_B N_i \kappa_1 V_t \cdot \hat{n} dB - \int_B N_i V_1 \cdot \hat{n} dB - \int_B N_i \kappa_1 \kappa (\rho_1 - \bar{\rho}) g \nabla z \cdot \hat{n} dB, \\ i \in \{1, 2, \dots, N\} \quad (S47)$$

The time derivative term in Eq. (S42) can be numerically expressed as follows:

$$\frac{[C_1]}{\Delta t} \{S_1\}^{n+1} + w [ADW_1 + DD_1 + WW_1] \{S_1\}^{n+1} = \\ \frac{[C_1]}{\Delta t} \{S_1\}^n + (w - 1) [ADW_1 + DD_1 + WW_1] \{S_1\}^n + \{f_1\} \quad (S48)$$

where the superscripts  $n$  and  $n + 1$  indicate the old and new time levels, respectively. Eq. (S48) can be solved in an explicit form at  $w = 0$ , in a Crank-Nicholson central difference form at  $w = 0.5$ , and in an implicit form at  $w = 1$ . Similarly, the equations governing dissolved

contaminant concentration (S28) and surfactant concentration (S33) can be solved using the Galerkin finite element method, as follows:

$$[M_k] \left\{ \frac{D_{V_{d,k}} C_k}{Dt} \right\} + [D + K_k] \{C_k\} = \{B_k\} + \{R_k\}, \quad k = o, s \quad (S49)$$

where  $k$  indicates the solute species ( $k = o$ ) or surfactant ( $k = s$ ).

$$[M_k]_{i,j} = \int_{\Omega} N_i (\theta_1 + \rho_b K_{d,k}) N_j dR, \quad i, j \in \{1, 2, \dots, N\}, \quad k = o, s \quad (S50)$$

$$[D]_{i,j} = \int_{\Omega} \nabla N_i \cdot \theta_1 D \cdot \nabla N_j dR, \quad i, j \in \{1, 2, \dots, N\}, \quad k = o, s \quad (S51)$$

$$[K_k]_{i,j} = \int_{\Omega} N_i \left[ \frac{Q_1}{\rho_1} + C_n^w \right] N_j dR, \quad i, j \in \{1, 2, \dots, N\}, \quad k = o \quad (S52)$$

$$[K_k]_{i,j} = \int_{\Omega} N_i \frac{Q_1}{\rho_1} N_j dR, \quad i, j \in \{1, 2, \dots, N\}, \quad k = s \quad (S53)$$

$$\{B_k\}_i = \int_B N_i \hat{n} \cdot (\theta_1 D \cdot \nabla C_k) dB, \quad i \in \{1, 2, \dots, N\}, \quad k = o, s \quad (S54)$$

$$\{R_k\}_i = \int_B N_i (C_n^w \overline{\rho_n^w}) dR, \quad i \in \{1, 2, \dots, N\}, \quad k = o \quad (S55)$$

$$\{R_k\}_i = 0, \quad i \in \{1, 2, \dots, N\}, \quad k = s \quad (S56)$$

with  $C_n^w$  and  $\overline{\rho_n^w}$  in Eqs. (S52) and (S55) representing parameters related to the dissolution process described by Eq. (S30). The numerical procedure is in detail presented in Fig. S1. First of all, the numerical simulation conducts to the total pressure  $P_t$  using Eq. (S36) at step II, and solves the total velocity  $V_t$  using Eq. (S17) at step III. After then, using the total pressure and total velocity, the water saturation  $S_1$  is solved in Eq. (S42) at step IV. Since the water saturation equation is a nonlinear, the iterative process is needed to get the conserved solution at step V. After getting the conserved solution of the water saturation, NAPL saturation is obtained using  $S_2 = 1 - S_1$  and water phase Darcy velocity  $V_1$  is calculated in Eq. (S19). The concentration of the dissolved contaminant  $C_o$  in Eq. (S28) and the concentration of surfactant  $C_s$  in Eq. (S33) are calculated by using Eq. (S49) at step VIII.

## References

- Parker JC, Lenhard RJ, Kuppusamy T (1987) A parametric model for constitutive properties governing multiphase flow in porous media. *Water Resources Research* 23(4):618-624, DOI: 10.1029/WR023i004p00618
- Pennell KD, Jin M, Abriola LM, Pope GA (1994) Surfactant-enhanced remediation of soil columns contaminated by residual tetrachloroethylene. *Journal of Contaminant Hydrology* 16(1):35-53, DOI: 10.1016/0169-7722(94)90071-X
- Suk H, Yeh G-T (2007) 3D, Three-Phase Flow Simulations Using the Lagrangian–Eulerian Approach with Adaptively Zooming and Peak/Valley Capturing Scheme. *Journal of Hydrologic Engineering* 12(1):14-32, DOI: 10.1061/(ASCE)1084-0699(2007)12:1(14)
- Suk H, Yeh G-T (2008) Multiphase flow modeling with general boundary conditions and automatic phase-configuration changes using a fractional-flow approach. *Computers & Geosciences* 12:541–571, DOI: 10.1007/s10596-008-9094-x
- Suk H, Yeo I-W, Lee K-K (2011) Development of multiphase flow simulator using the fractional flow based approach for wettability dependent NAPL. *Economic and Environmental Geology* 44(2):161-170 (in Korean)
- Zhong L, Mayer AS, Pope GA (2003) The effects of surfactant formulation on nonequilibrium NAPL solubilization. *Journal of Contaminant Hydrology* 60(1-2):55-75, DOI: 10.1016/S0169-7722(02)00063-3

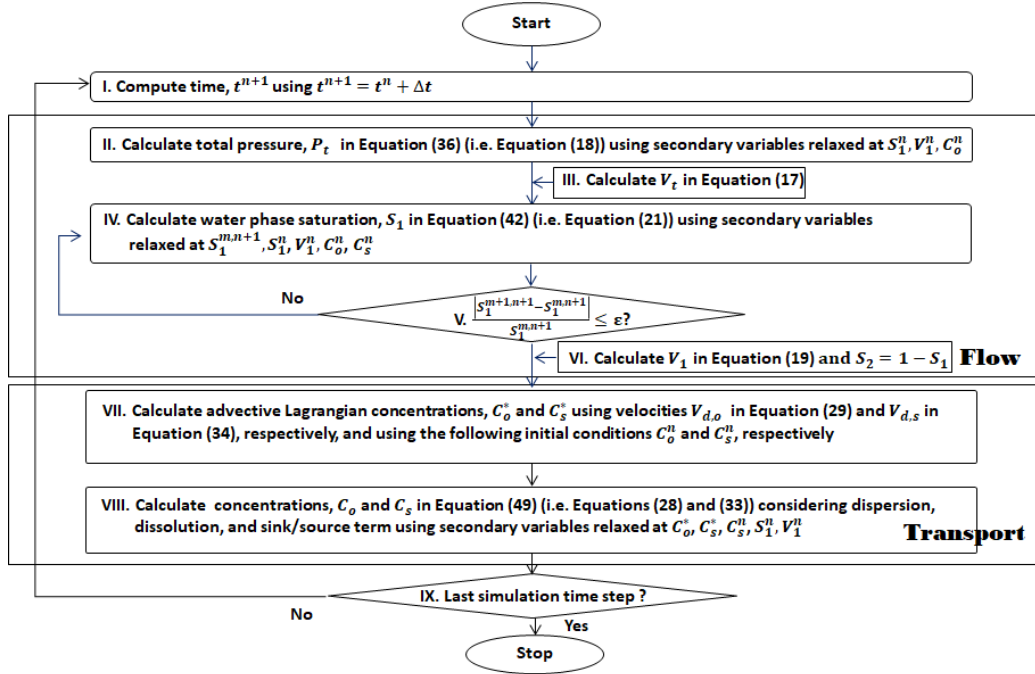

**Figure S1.** Flow chart for proposed numerical method.  $t^{n+1}$  and  $t^n$  are new and old time levels, respectively,  $\Delta t$  is time step,  $P_t$  is the total pressure,  $S_1$  and  $S_2$  are the water phase and NAPL phase saturations, respectively,  $V_t$  is the total velocity,  $V_1$  is the Darcy velocity of water,  $C_o$  and  $C_s$  are the concentrations of dissolved contaminant and surfactant, respectively,  $V_{d,o}$  and  $V_{d,s}$  are the particle tracking velocities for dissolved contaminant and surfactant, respectively, superscripts  $n + 1$  and  $n$  indicate the new and old time levels, respectively, superscript  $m$  is the nonlinear iteration level, and superscript  $*$  indicates the results of particle tracking.
